# Supplementary material for: Sweet taste of heavy water
Source: PubMed Central journal article supplement (PMC8024362; doi:10.1038/s42003-021-01964-y), 2021-04-06
Supplement: 42003_2021_1964_MOESM2_ESM.pdf [file 42003_2021_1964_MOESM2_ESM.pdf]

## Description of Additional Supplementary Files

**File name:** Supplementary Data 1

**Description:** Raw data for Figure 2.

**File name:** Supplementary Data 2

**Description:** Raw data for Figure 3.

**File name:** Supplementary Data 3

**Description:** Raw data for Figure 4.

**File name:** Supplementary Data 4

**Description:** Raw data for Figure 5a.

**File name:** Supplementary Data 5

**Description:** Raw data for Figure 5c.

**File name:** Supplementary Data 6

**Description:** Raw data for Figure 6.

**File name:** Supplementary Data 7

**Description:** Raw data for Figure 7b.

**File name:** Supplementary Data 8

**Description:** Raw data for Figure 7d.
